# Supplementary material for: Sand mining far outpaces natural supply in a large alluvial river
Source: Copernicus journal article supplement (doi:10.5194/esurf-9-1323-2021), 2021-09-30
Supplement: Supplementary file 1 [file esurf-9-1323-2021-supplement.pdf]

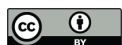

## *Supplement of*

# **Sand mining far outpaces natural supply in a large alluvial river**

**Christopher R. Hackney et al.**

*Correspondence to:* Christopher R. Hackney ([christopher.hackney@ncl.ac.uk](mailto:christopher.hackney@ncl.ac.uk))

The copyright of individual parts of the supplement might differ from the article licence.

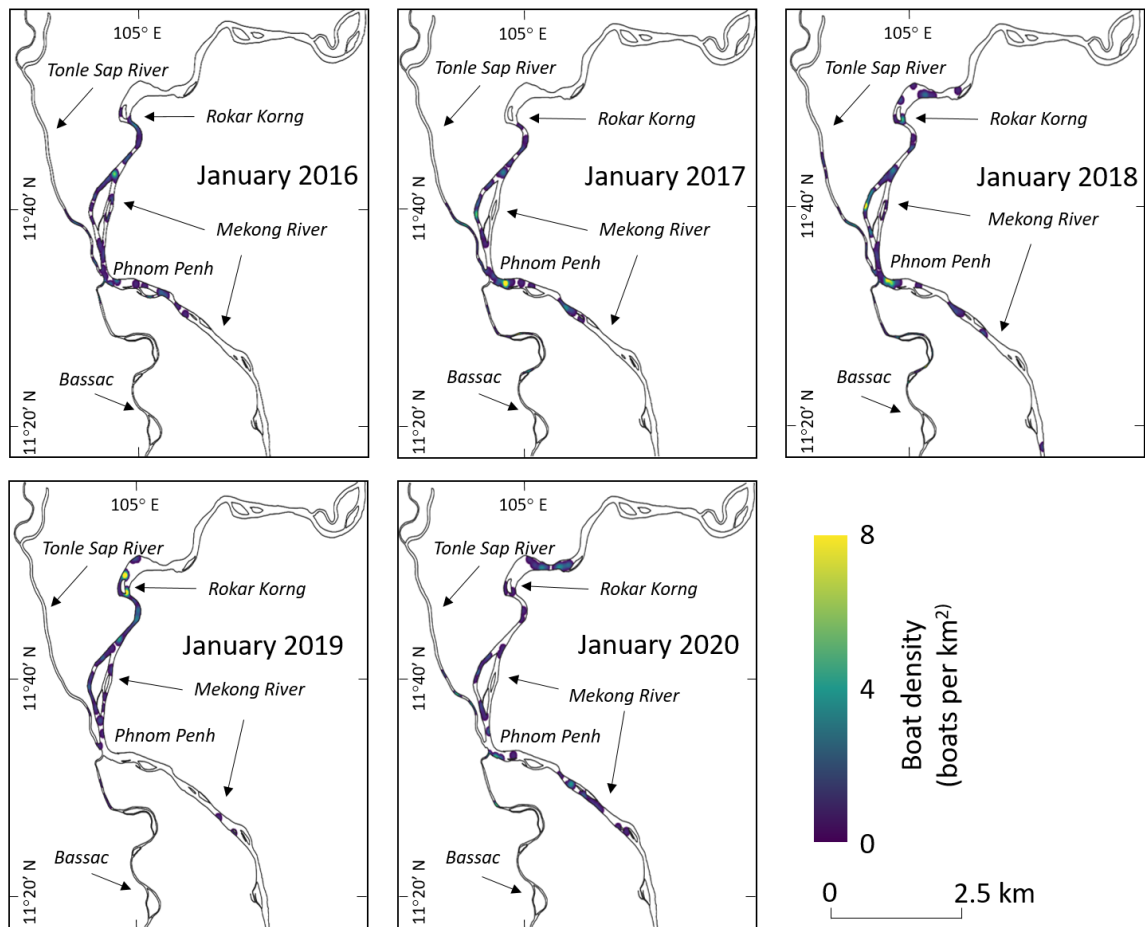

**Figure S1: Annual heat maps for January for the period 2016 - 2020 of the Mekong River around Phnom Penh showing the locations of mining activity and the density of boats (boats per km<sup>2</sup>) showing changes in the spatial distribution of mining activity over the five year period.**

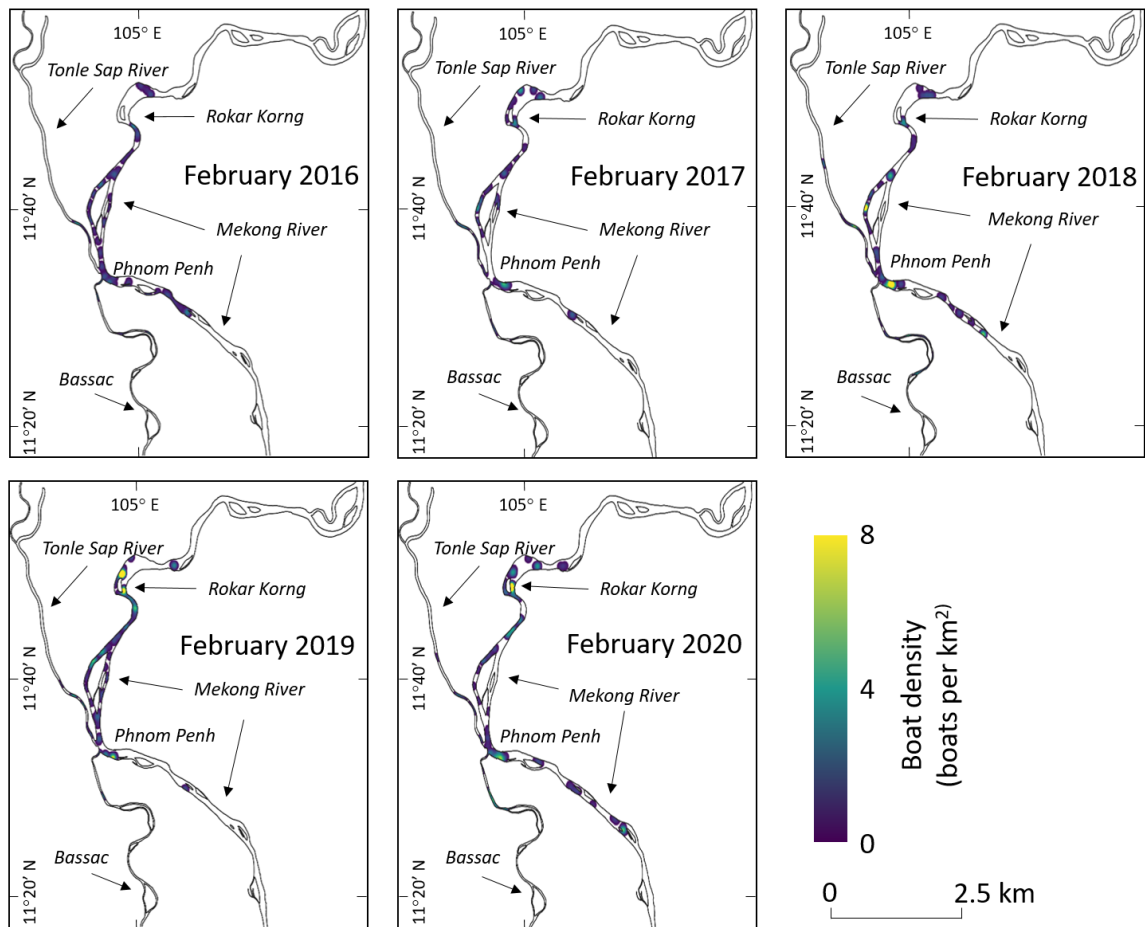

**Figure S2: Annual heat maps for February for the period 2016 - 2020 of the Mekong River around Phnom Penh showing the locations of mining activity and the density of boats (boats per km<sup>2</sup>) showing changes in the spatial distribution of mining activity over the five year period.**

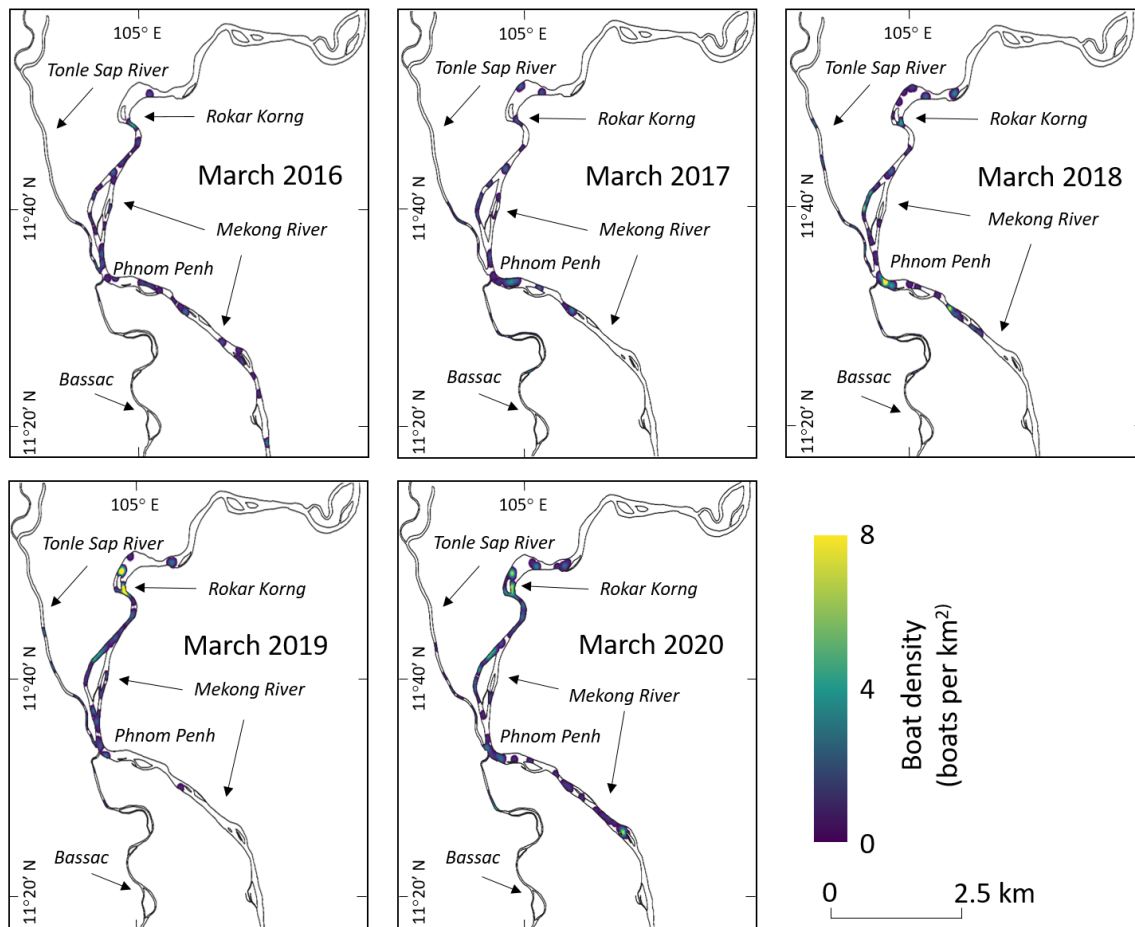

**Figure S3: Annual heat maps for March for the period 2016 - 2020 of the Mekong River around Phnom Penh showing the locations of mining activity and the density of boats (boats per km<sup>2</sup>) showing changes in the spatial distribution of mining activity over the five year period.**

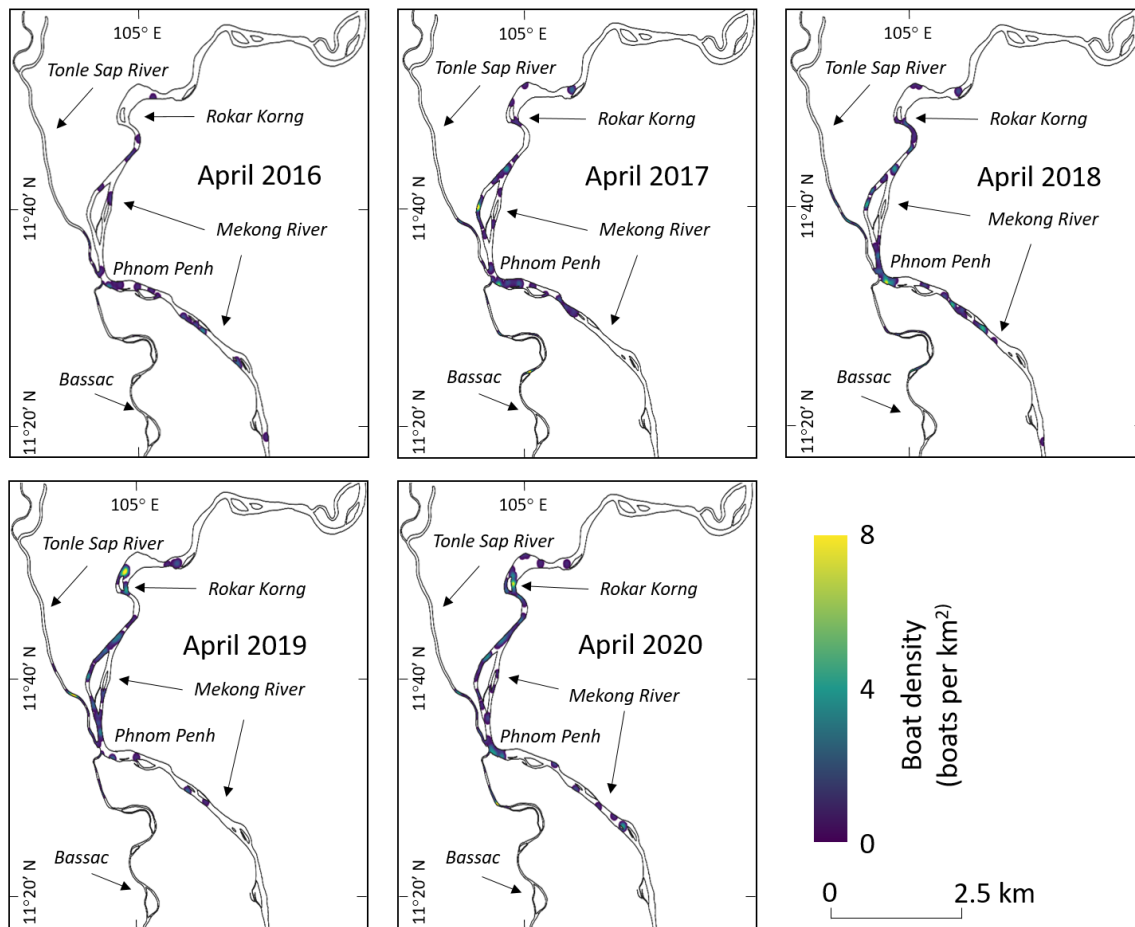

**Figure S4: Annual heat maps for April for the period 2016 - 2020 of the Mekong River around Phnom Penh showing the locations of mining activity and the density of boats (boats per km<sup>2</sup>) showing changes in the spatial distribution of mining activity over the five year period.**

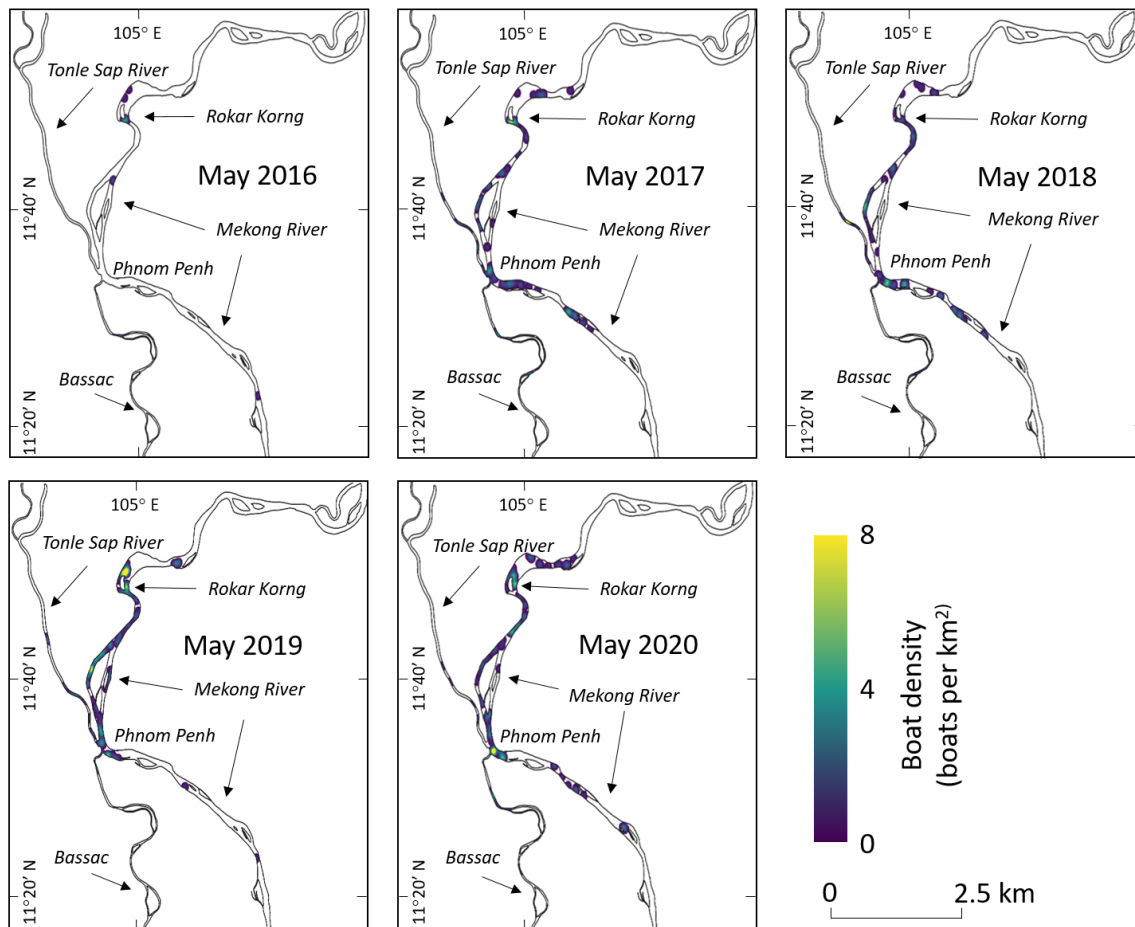

**Figure S5: Annual heat maps for May for the period 2016 - 2020 of the Mekong River around Phnom Penh showing the locations of mining activity and the density of boats (boats per km<sup>2</sup>) showing changes in the spatial distribution of mining activity over the five year period.**

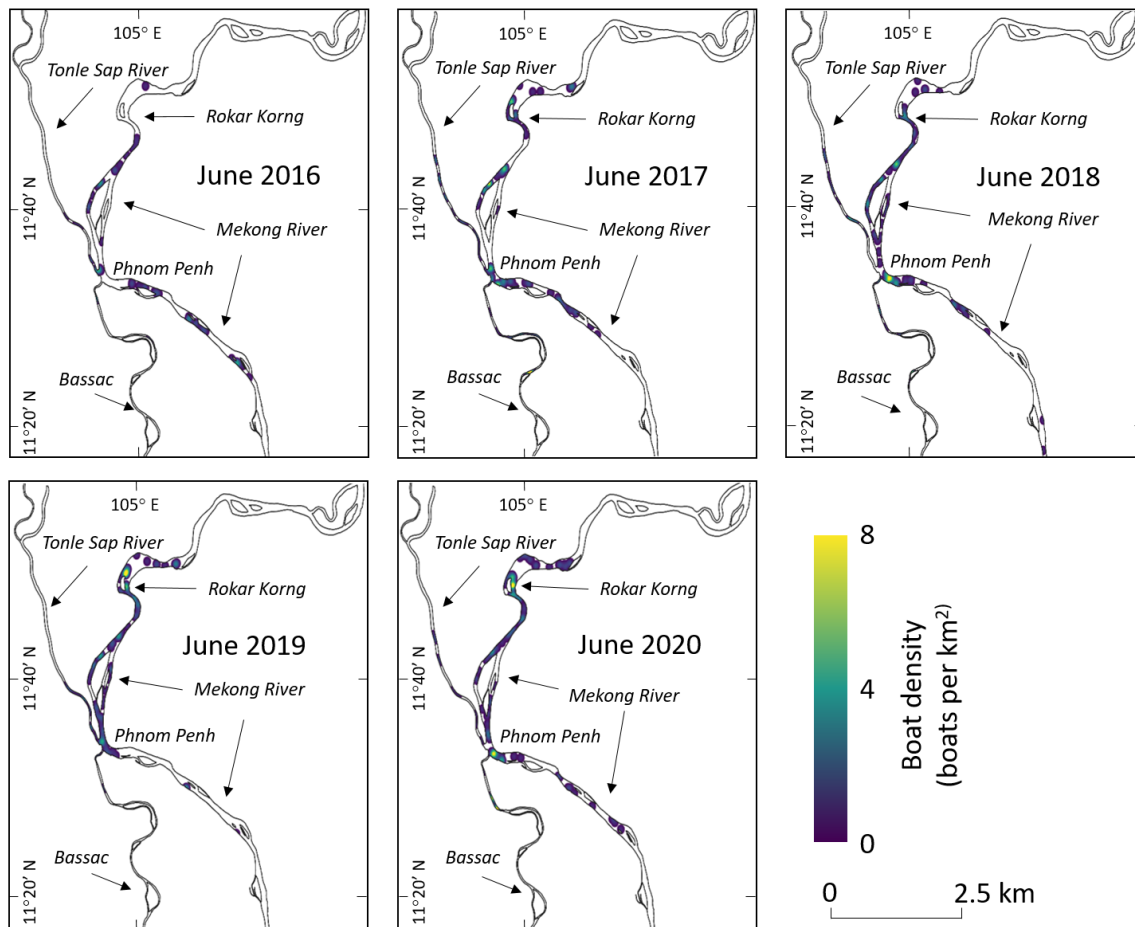

**Figure S6: Annual heat maps for June for the period 2016 - 2020 of the Mekong River around Phnom Penh showing the locations of mining activity and the density of boats (boats per km<sup>2</sup>) showing changes in the spatial distribution of mining activity over the five year period.**

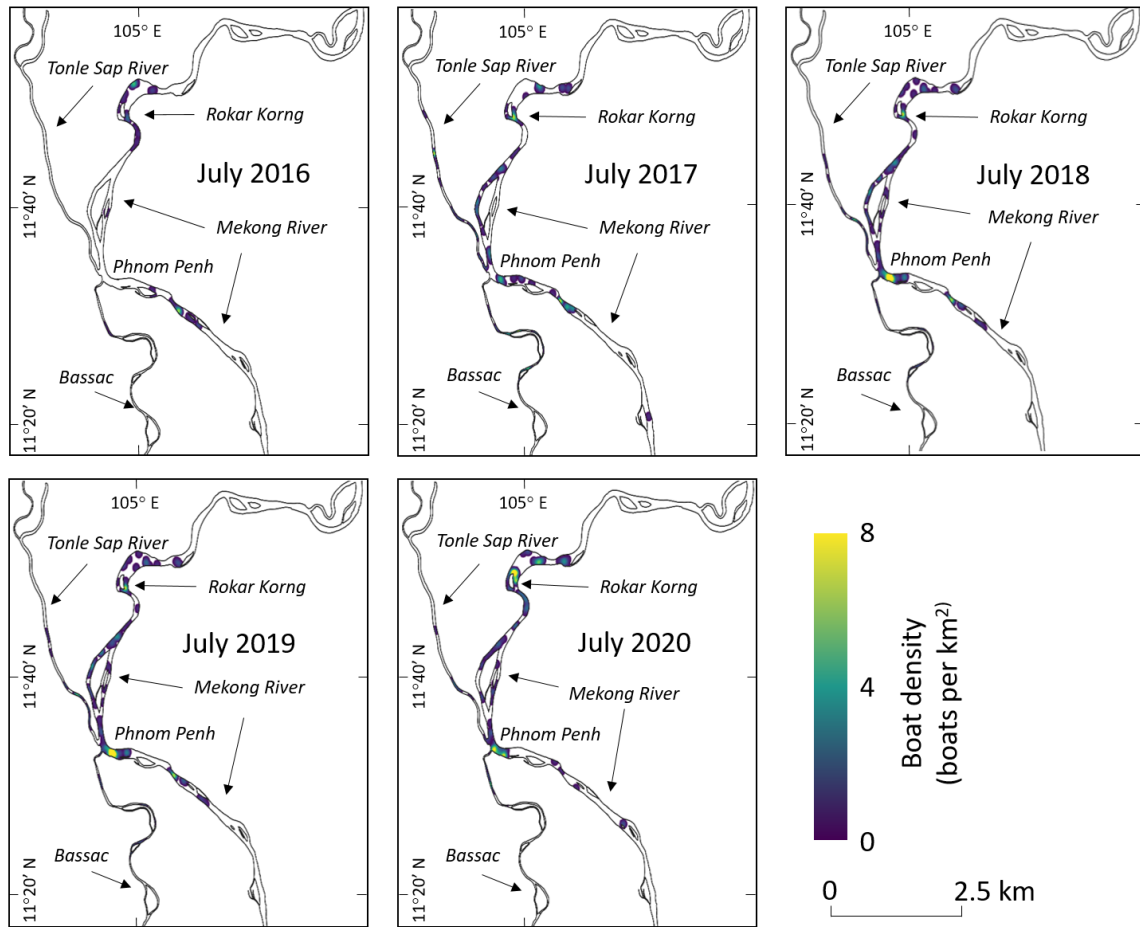

**Figure S7: Annual heat maps for July for the period 2016 - 2020 of the Mekong River around Phnom Penh showing the locations of mining activity and the density of boats (boats per km<sup>2</sup>) showing changes in the spatial distribution of mining activity over the five year period.**



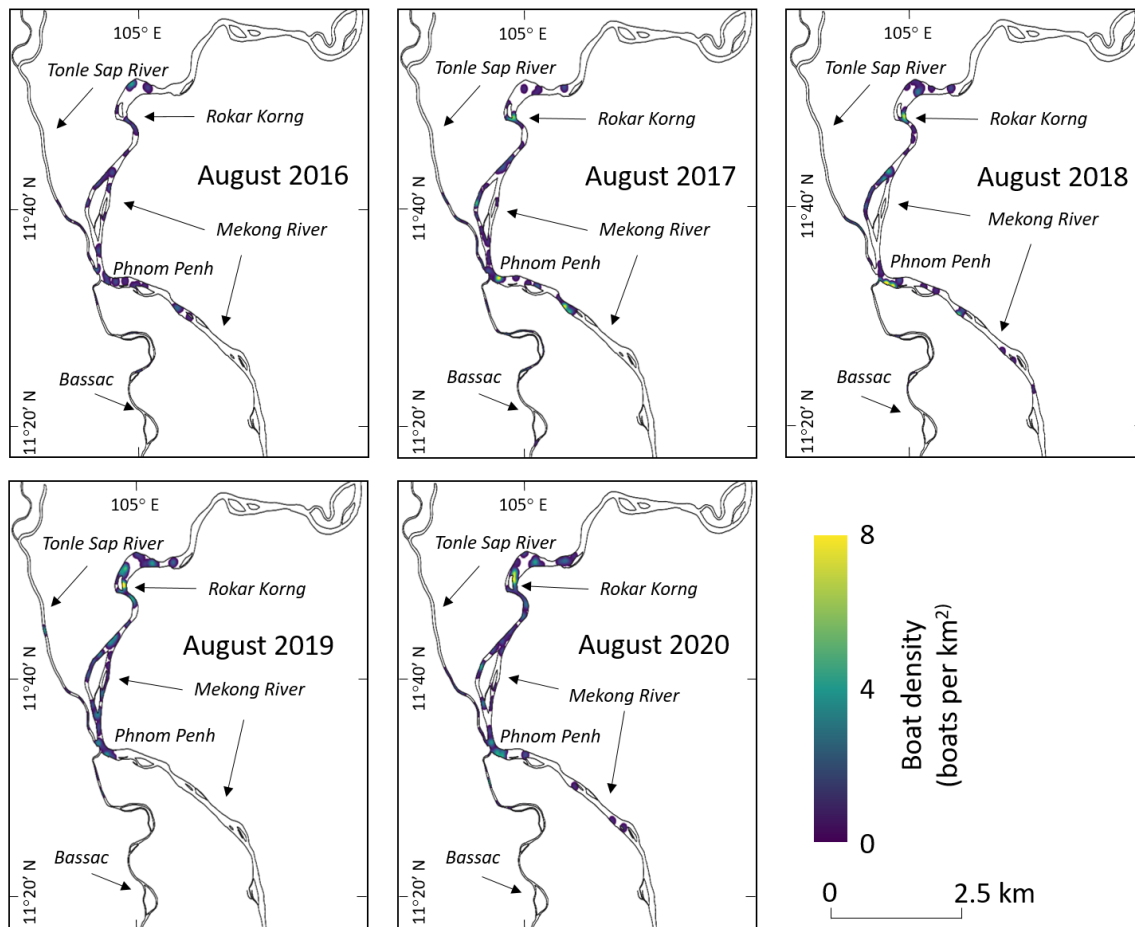

**Figure S8: Annual heat maps for August for the period 2016 - 2020 of the Mekong River around Phnom Penh showing the locations of mining activity and the density of boats (boats per km<sup>2</sup>) showing changes in the spatial distribution of mining activity over the five year period.**

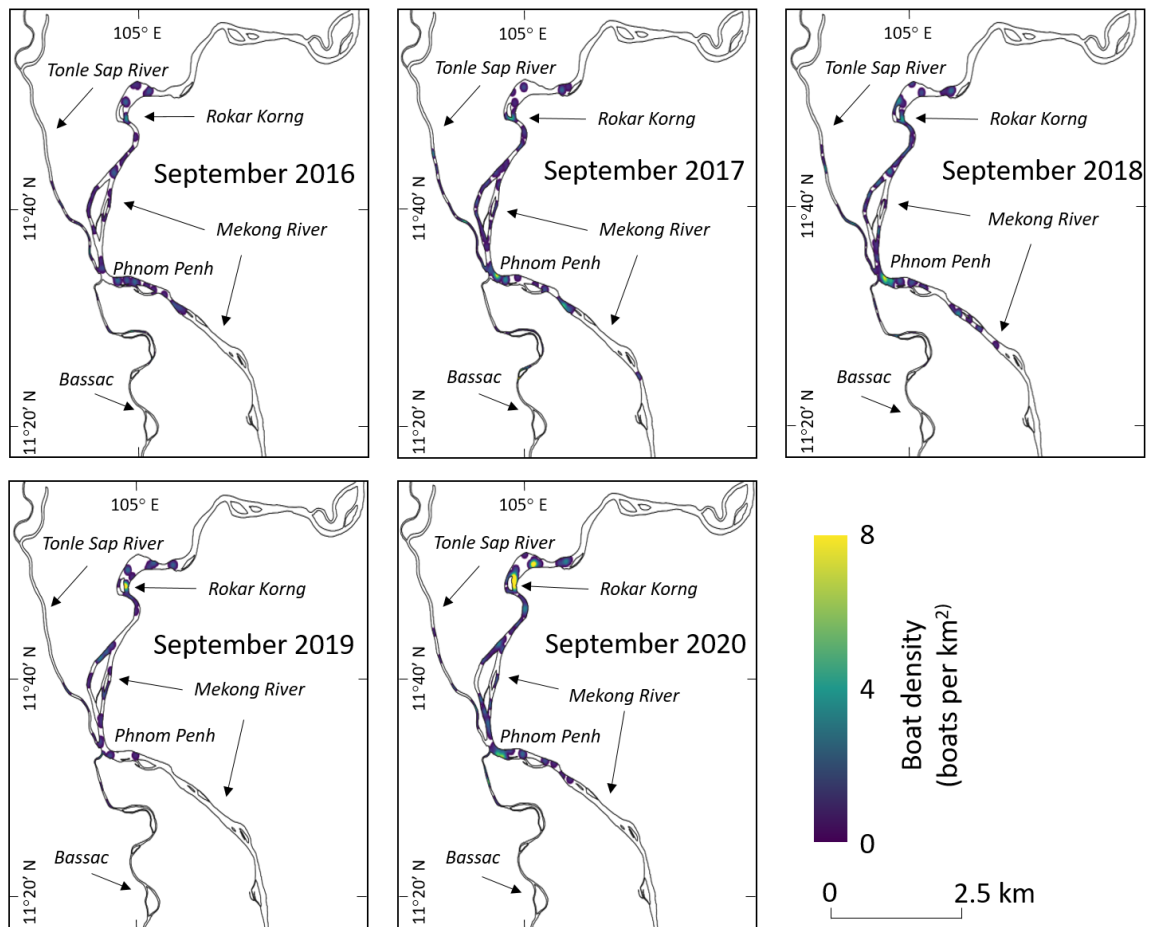

**Figure S9: Annual heat maps for September for the period 2016 - 2020 of the Mekong River around Phnom Penh showing the locations of mining activity and the density of boats (boats per km<sup>2</sup>) showing changes in the spatial distribution of mining activity over the five year period.**

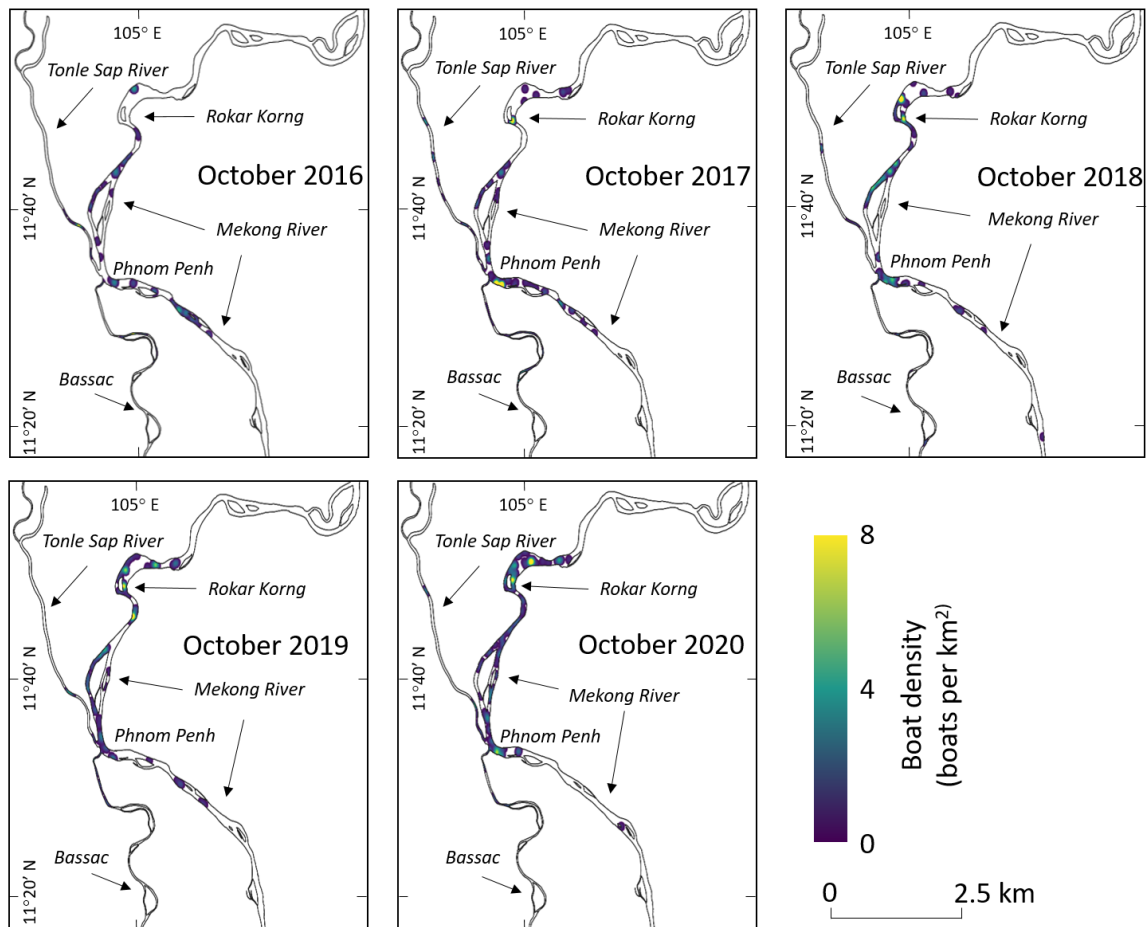

**Figure S10: Annual heat maps for October for the period 2016 - 2020 of the Mekong River around Phnom Penh showing the locations of mining activity and the density of boats (boats per km<sup>2</sup>) showing changes in the spatial distribution of mining activity over the five year period.**

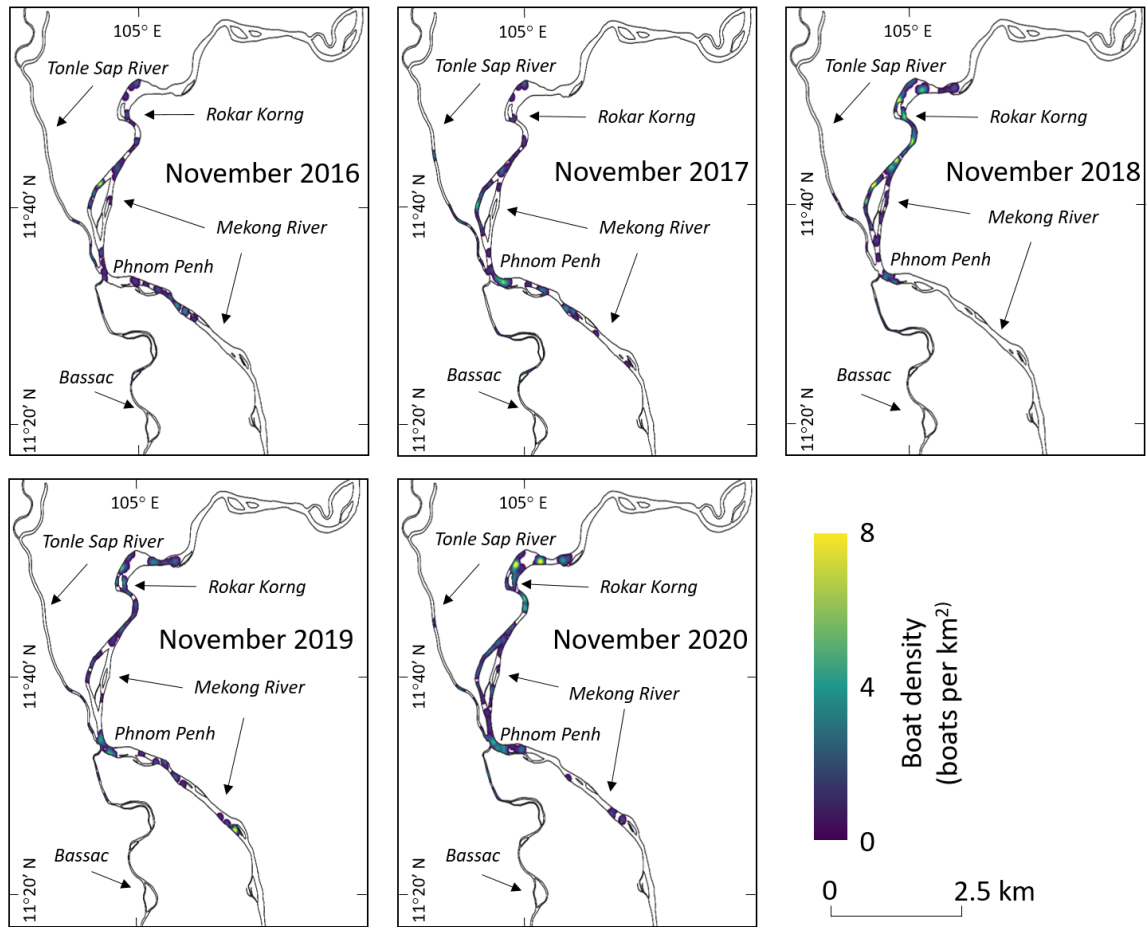

**Figure S11: Annual heat maps for November for the period 2016 - 2020 of the Mekong River around Phnom Penh showing the locations of mining activity and the density of boats (boats per km<sup>2</sup>) showing changes in the spatial distribution of mining activity over the five year period.**

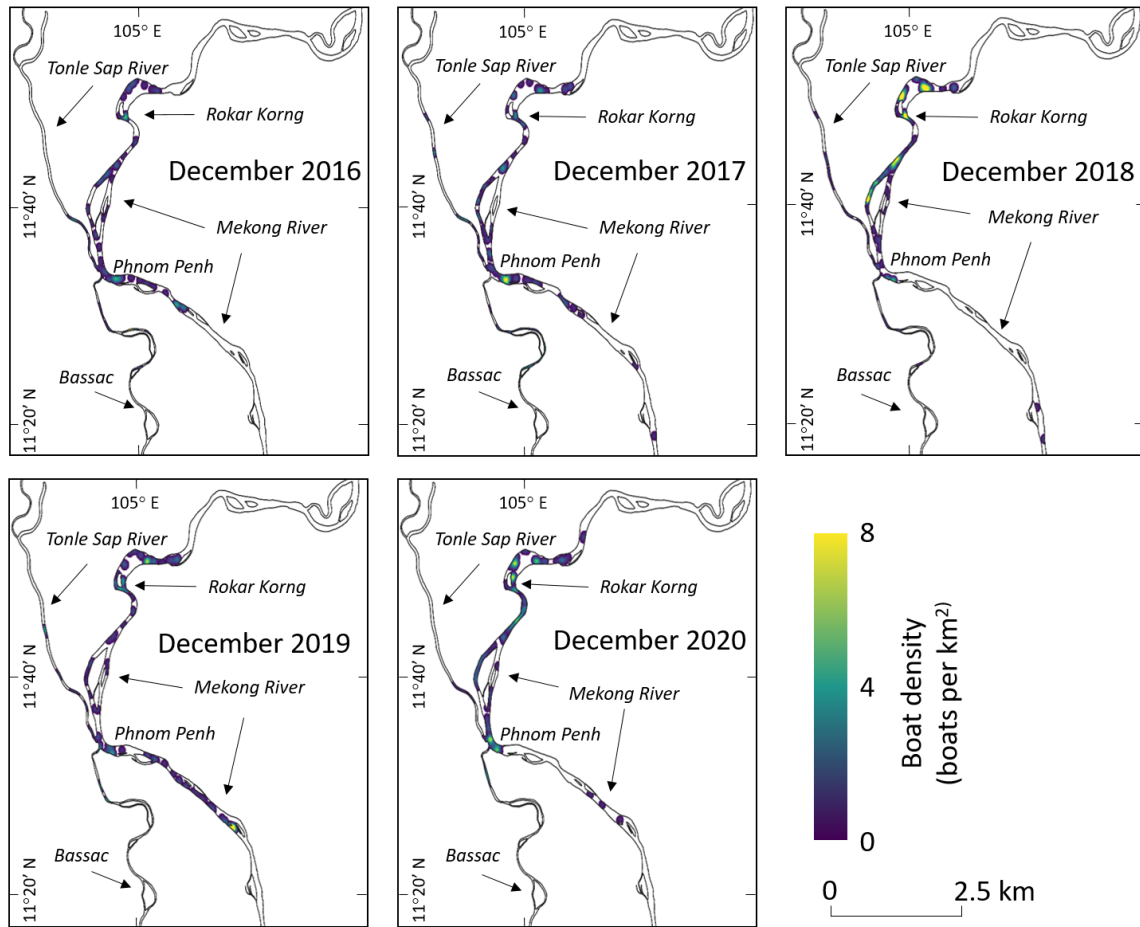

**Figure S12: Annual heat maps for December for the period 2016 - 2020 of the Mekong River around Phnom Penh showing the locations of mining activity and the density of boats (boats per km<sup>2</sup>) showing changes in the spatial distribution of mining activity over the five year period.**
